# Supplementary material for: Generating rapamycin analogues by directed biosynthesis: starter acid substrate specificity of mono-substituted cyclohexane carboxylic acids
Source: Royal Society of Chemistry journal article supplement (doi:10.1039/b614519c), 2006-01-01
Supplement: b614519c.doc [file b614519c.doc]

**Supplementary Information**

**Additional Scheme** Explaination for poor yields in the fluorination of substituted cyclohexanols, adapted from Mange.16

**Synthesis of 4-fluorocyclohexane carboxylic acid**

4-Fluorocyclohexanone

Method 1

HF-pyridine (0.86 mL) was added to a 4-hydroxycyclohexanone (103 mg, 0.91 mmol) contained within a plastic vessel cooled to 0°C and stirred under nitrogen for two hours. The reaction was quenched by the addition of ice cold water (1 mL) and extracted into ethyl acetate (3 x 10 mL). The organic phase was dried over MgSO4, filtered and the solvent removed *in vacuo*. The product was purified by flash chromatography on silica, eluting with a mixture of petroleum ether and ethyl acetate (9:1) to give the *title compound* as a yellow transparent oil (26 mg, 0.22 mmol, 24 %).

Method 2

Diethylaminosulphur trifluoride (DAST) (0.35 mL, 2.65 mmol) in dichloromethane (20 mL), cooled to –78°C was added via cannula to a solution of 4-hydroxycyclohexanone (300 mg, 2.63 mmol) in dichloromethane (100 mL) previously cooled to -78°C and stirred under nitrogen. The solution was then placed in an ice bath and left to stir at 0 °C. The reaction went to completion after one hour, before water (30 mL) was added. The organic phase was separated, dried over MgSO4, filtered and the solvent removed *in vacuo*. The product was purified by flash chromatography on silica, eluting with a mixture of petroleum ether and ethyl acetate (9:1) to give the *title compound* as a yellow transparent oil (54 mg, 0.47 mmol, 18 %):

δH (CDCl3) 1.85-2.10 (m, 2H), 2.26-2.37 (m, 4H), 2.53-2.72 (m, 2H), 4.99 (dm, 1H, *J*HF = 48 Hz), δc (CDCl3) 29.5, 31.2 (d, 2C, 3*J*CF = 28.3 Hz), 36.2 (d, 2C, 4*J*CF = 6.1 Hz), 87.3 (d, *J*CF = 115.7 Hz), 300.0. δF (CDCl3) 187.0; MS (EI) *m / z* 117.1 (M+1); IR (neat film): max(cm-1) 1716 (C=O).

4-Fluorocyclohexancarbonitrile

Tosyl methyl isocyanide (55.5 mg, 0.28 mmol) in 1, 1-dimethoxyethane (DME) (0.7 mL) was added to 4-fluorocyclohexanone (30 mg, 0.26 mmol) in DME (0.7 mL) stirring under nitrogen before cooling to 0°C. Potassium *tert*-butoxide (58.1 mg, 0.52 mmol) in *tert*-butanol (0.8 mL) and DME (0.4 mL) was added via cannula to the previous cooled mixture. The reaction was left to stir for 3.5 hours at room temperature until completion and ether (30 mL) added. The organic phase was washed with aqueous NaHCO3 solution (10%, 2×10 mL), saturated aqueous NaCl solution (2 ×10 mL), dried on MgSO4, and filtered. The solvents were removed *in* *vacuo*. Flash chromatography was not employed as the product rapidly decomposed on silica. The crude product was dissolved in ether (1mL), filtered through cotton wool and the filtrate evaporated in *vacuo* to give a 6 to 4 mixture of the *trans* and *cis* isomer (29.5 mg, 0.23 mmol, 88%) as a light brown oil: δH (CDCl3) 1.52-1.85 (m, 4H), 1.90-2.05 (m, 4H), 2.54-2.65 (m, 0.6 H, CH-CN, *trans*), 2.72-2.82 (m 0.4 H, CH-CN, *cis*), 4.21 (dm, 0.6H, *J*HF = 48 Hz, *trans*), 4.27 (dm, 0.6H, *J*HF = 48 Hz, *cis*). δC (CDCl3) 24.71 (d, 4*J*CF = 4.9 Hz), 29.19 (d, 3*J*CF = 22.2 Hz), 29.711, 129.19 (d, *J*CF = 165.1 Hz), 152.164. δF (CDCl3) 182.4 (2s); MS (EI) m/z =128.0 (M+1); IR (neat film): max(cm-1) 2233 (-CN).

4-Fluorocyclohexane carboxylic acid

A solution of aqueous sodium hydroxide (1M, 3.5 mL), and ethanol (0.35 mL) was added to 4-fluorocyclohexancarbonitrile (40.5 mg, 0.32 mmol) in ethanol (0.36 mL), and heated for 4 hours in an oil bath at 82°C. The ethanol was evaporated *in* *vacuo*. The aqueous phase was washed with diethyl ether (10 mL), acidified to between pH 1 and 2 using concentrated hydrochloric acid, extracted with diethyl ether (3×10 mL), the organic extracts combined, dried on sodium sulphate, filtered and evaporated to give a 6 to 4 mixture of the *trans* and *cis* isomer (28 mg, 0.192 mmol, 60%) as a light brown resin: δH (CDCl3) 1.38-2.12 (m, 8H), 2.20-2.38 (m, 1H), 4.43 (dm, 0.4H, *J*HF = 54 Hz, *trans*), 4.72 (dm, 0.6H, *J*HF = 48 Hz, *cis*); δC (MHz, CDCl3) 23.3 (d, 4*J*CF = 4.0 Hz, *trans*) 26.0 (d, 4*J*CF = 14.1 Hz, *cis*), 30.2 (d, 3*J*CF = 28.2, Hz, *trans*), 31.3 (d, 3*J*CF = 26.2 Hz, *cis*), 41.5 (*trans*), 41.7 (*cis*), 88.5 (d, *J*CF = 225.4 Hz, *trans*), 91.14 (d, *J*CF = 229.4 Hz, *cis*), 181.6 (*trans*), 181.7 (*cis*), δF (CDCl3) 174.7, 183.3; MS: (EI) m / z = 147.0 (M+1); IR (KBr pellet): max(cm-1) 2945 (OH), 1701 (=O).16

**Extraction Procedure and LC-MS data**

The fermentation broth (1 ml) was extracted with ethylacetate (1 ml). The organic phase was evaporated to dryness, and the residue resuspended in methanol (0.2 ml). The resultant solution (50 μL) was used for analysis by LCMS. LCMS was performed on an integrated Agilent HP1100 HPLC system in combination with a Bruker Daltonics Esquire 3000+ electrospray mass spectrometer operating in positive ion mode. Chromatography was achieved over a Phenomenex Hyperclone column (C18 BDS, 3u, 150 x 4.6 mm) eluting over 11 min at a flow rate of 1 mL/min with a linear gradient from acetonitrile / water (40/60) to acetonitrile / water (80/20).

The feeding of cyclohexane carboxylic acid  **3** yielded 39-deshydroxypre-rapamycin that

co-elutes with a previously generated sample reported by Gregory *et al*.11 RT = 8.5 min. [M+Na]+, m/z = 848.5; [M-H]-, m/z = 824.4; UV,λmax = 277 nm (exhibiting the typical rapamycin triene motif).

The feeding of 4-hydroxycyclohexane carboxylic acid **5** also yielded 39-deshydroxypre-rapamycin the analytical data for this compound are identical to those detailed above.

Feeding of 3-hydroxycyclohexane carboxylic acid **6** led to the production of a peak eluting at 8.8 min distinct to that reported above but with identical MS and UV characteristics.

Feeding the 3-hydroxy-1ene-cyclohexane carboxylic acid **8** led to the production of a rapamycin analogue, also eluting at 8.8 min again with identical MS and UV characteristics to the rapamycin analogue generated through the feeding of compound **3**.

Upon feeding compounds **7**, **12** and **13** to the microorganism and extracting the culture media it was not possible to detect any rapamycin.
